# Supplementary material for: The class II myosin MYH4 safeguards genome integrity and suppresses tumor progression
Source: JCI journal article supplement (doi:10.1172/jci188165), 2025-06-01

- 1    **Original uncropped western blot gel images:**
- 2    Images were taken using BioRad Geldoc system.

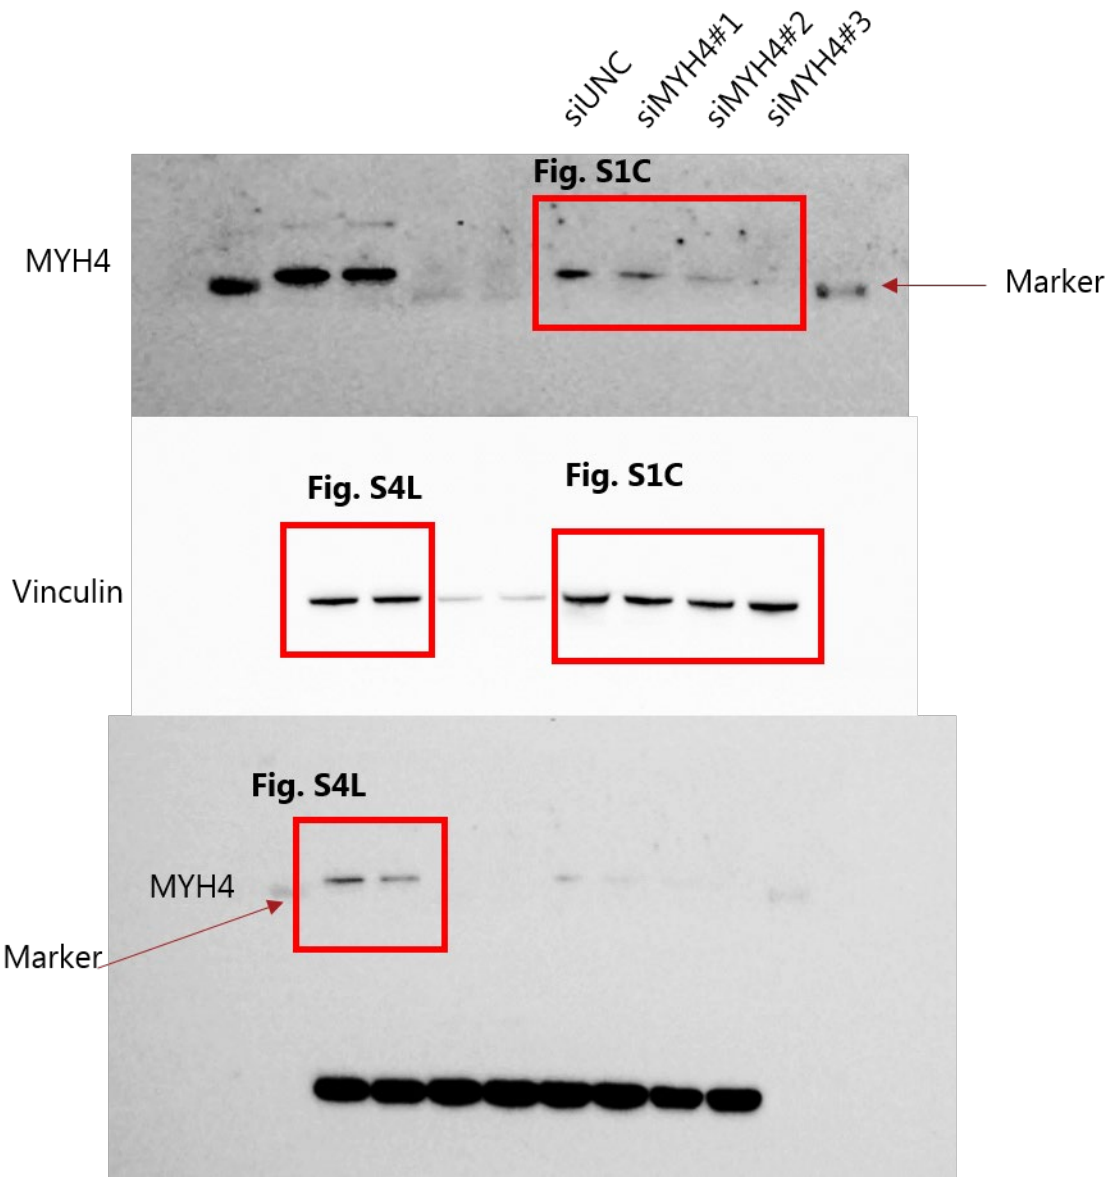

3

4

5

6

7

8

9  
10  
11  
12

Fig. S1D

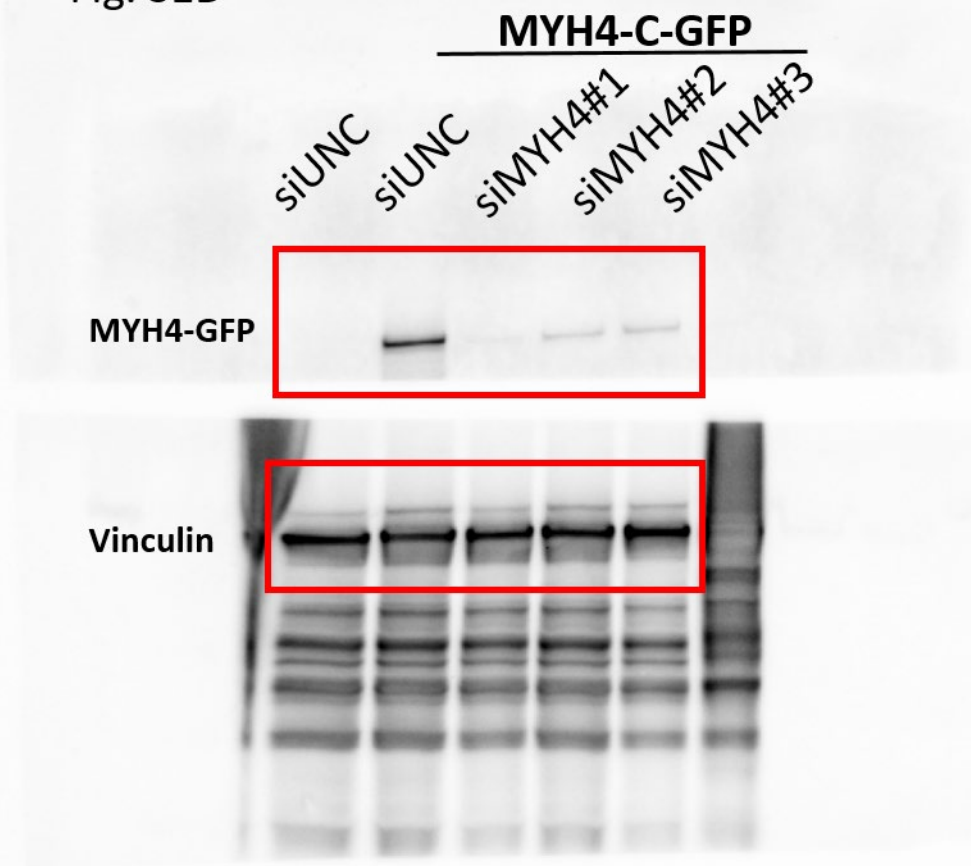

13  
14

Fig. S2A

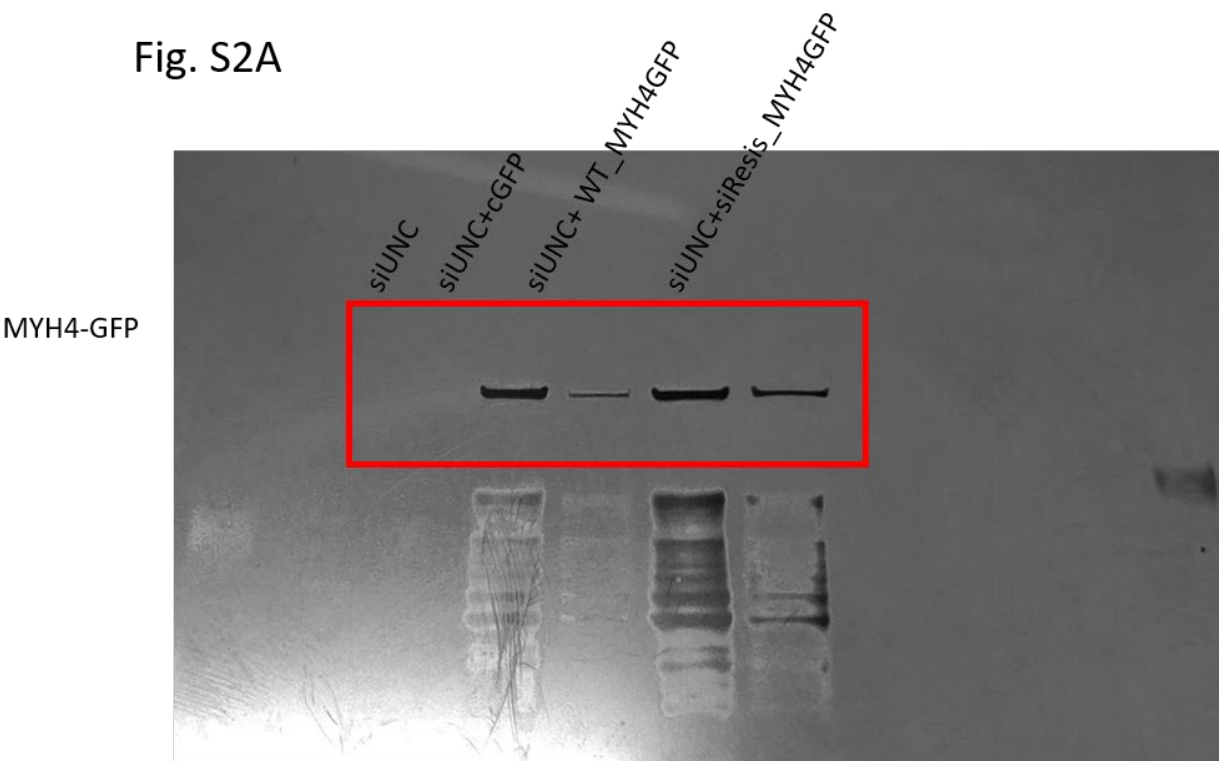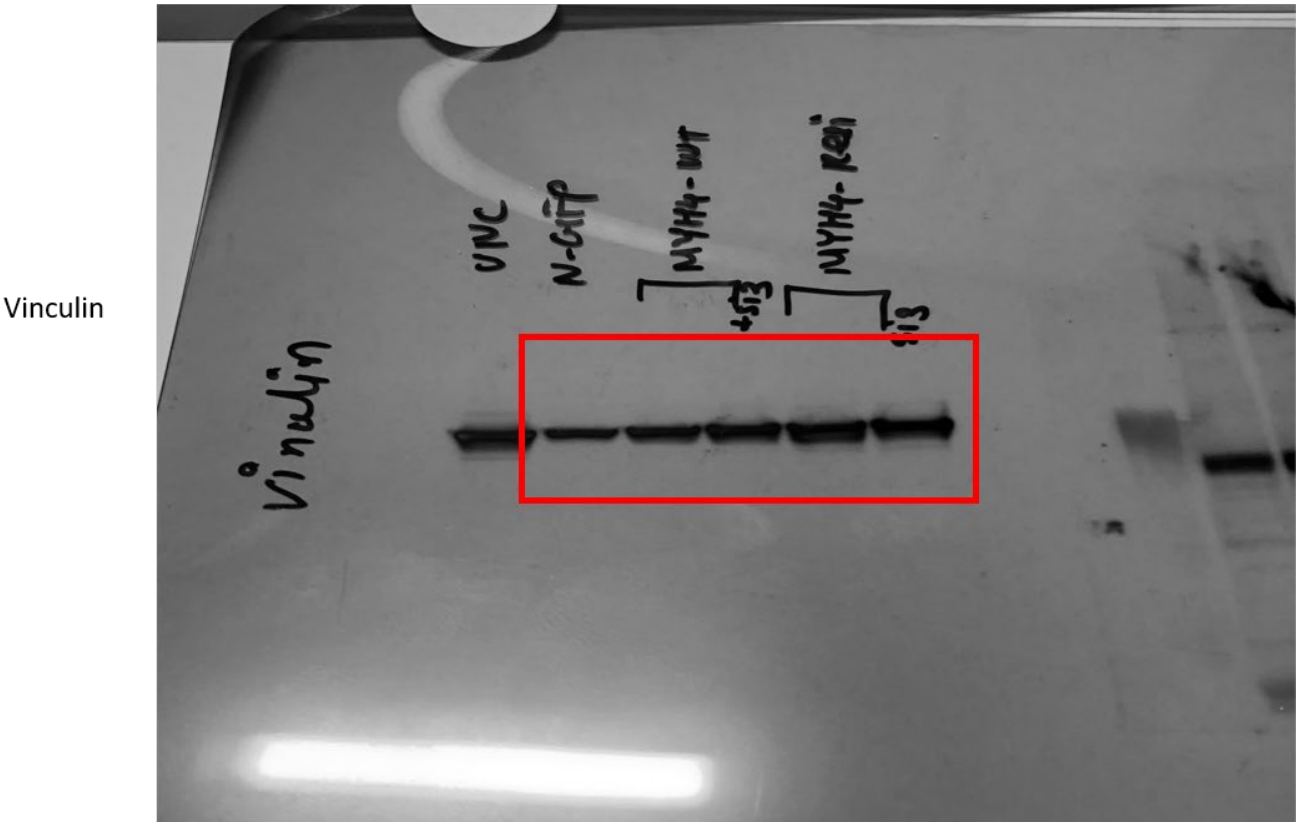

16 **Fig. 3E panels**

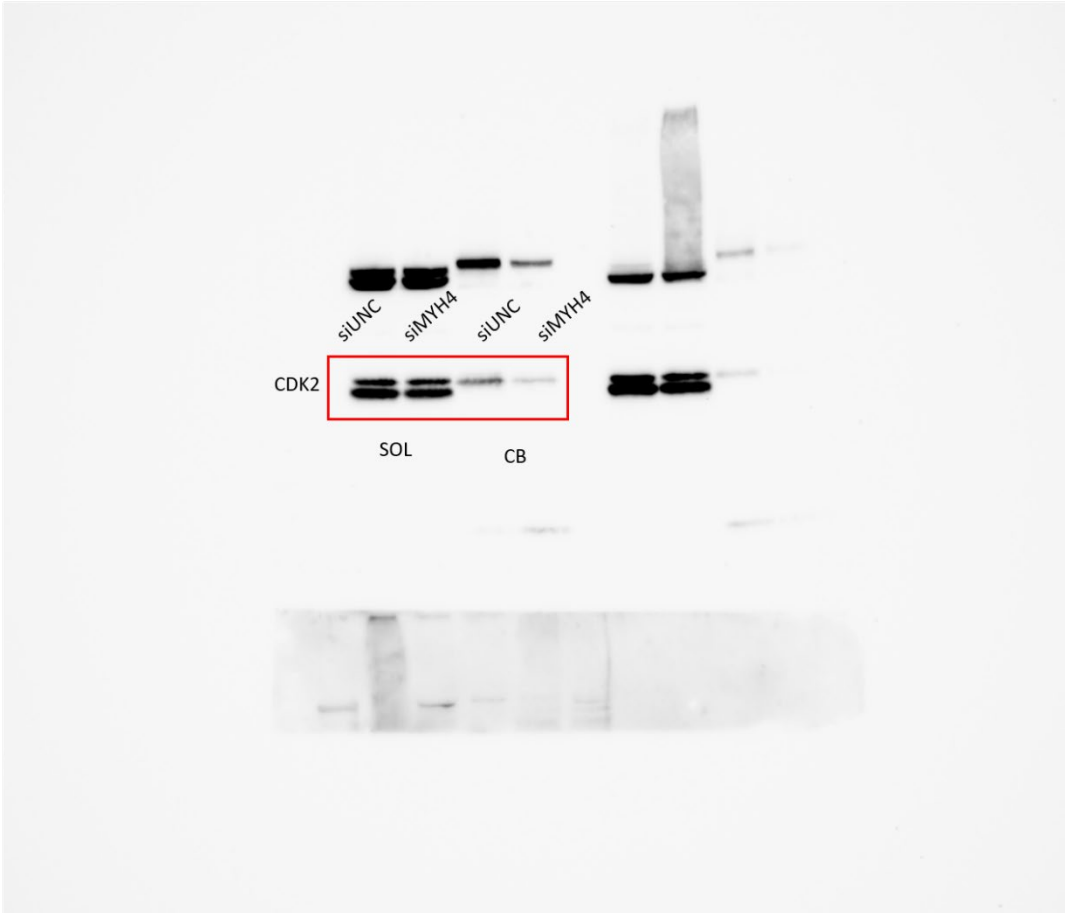

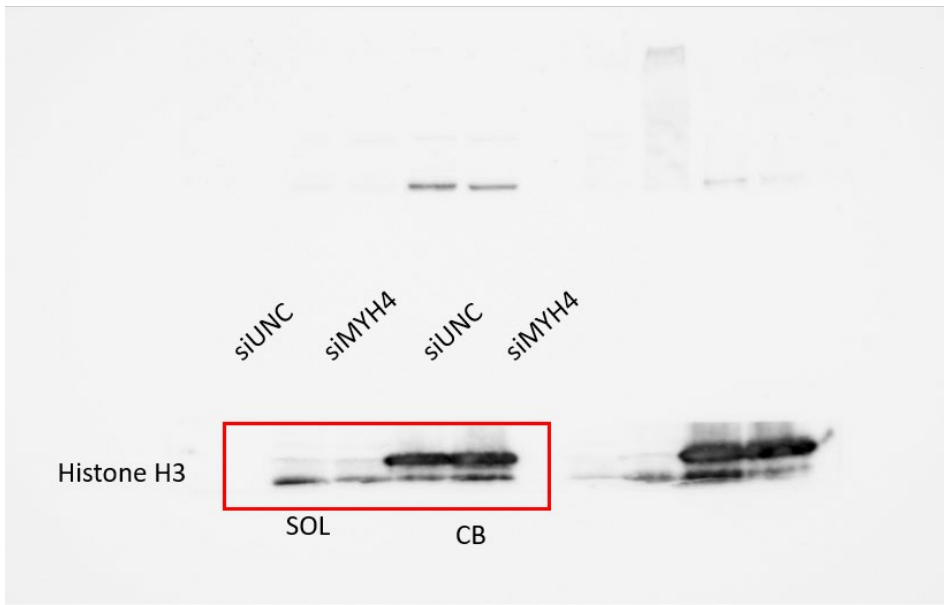

18

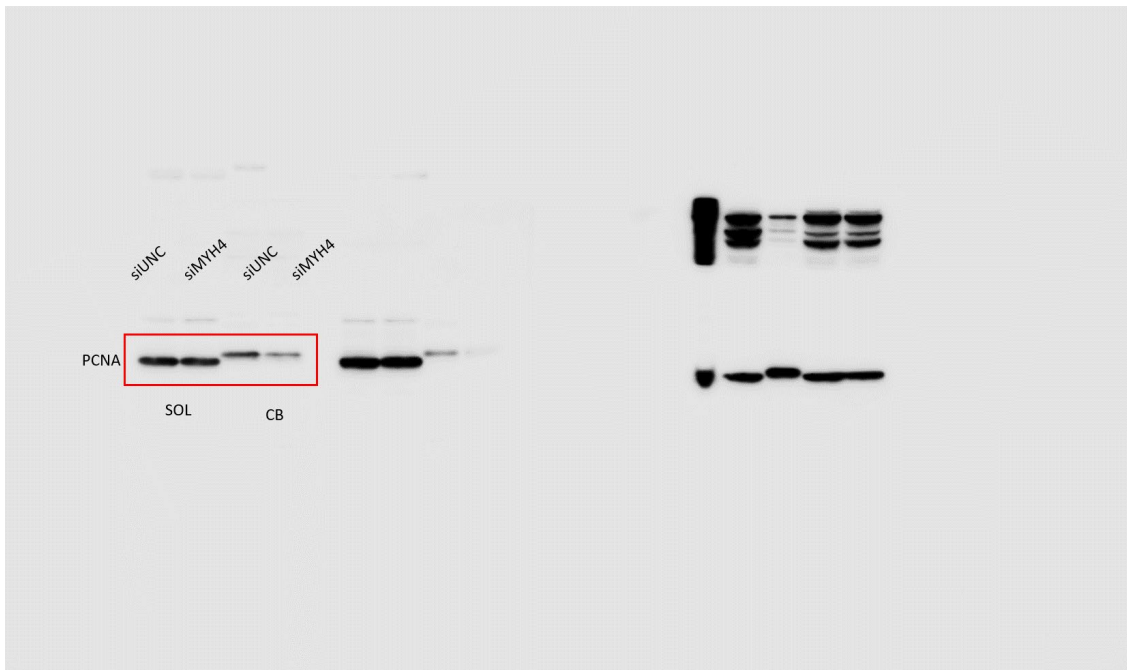

19

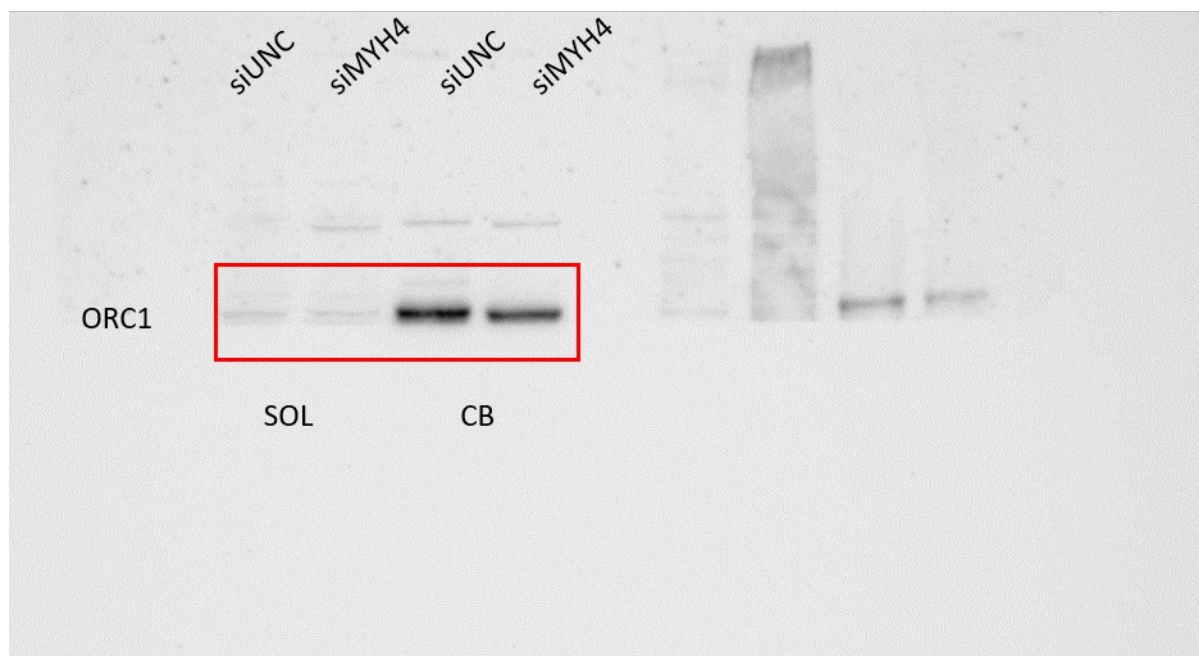

20

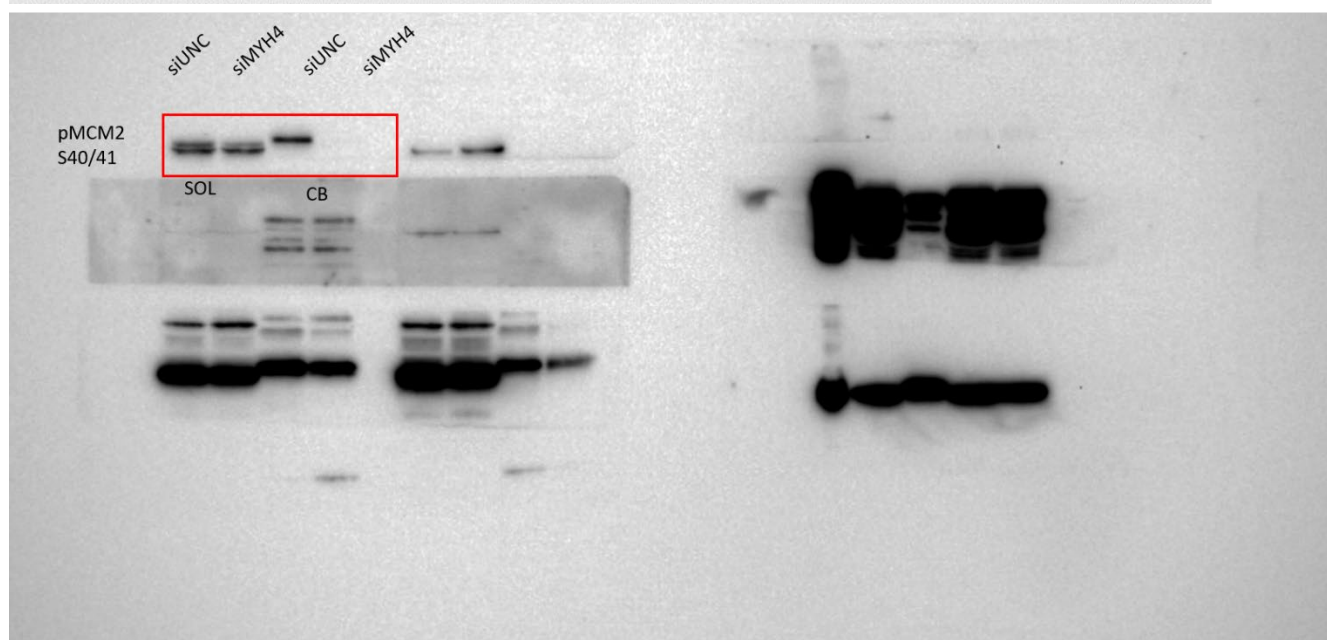

21

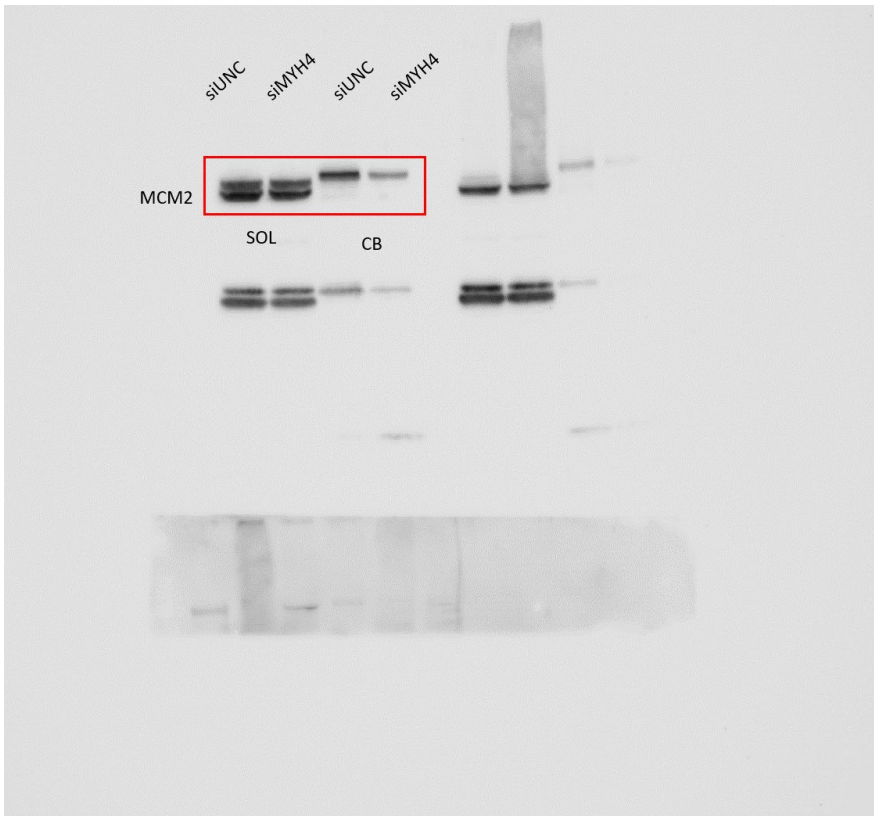

22

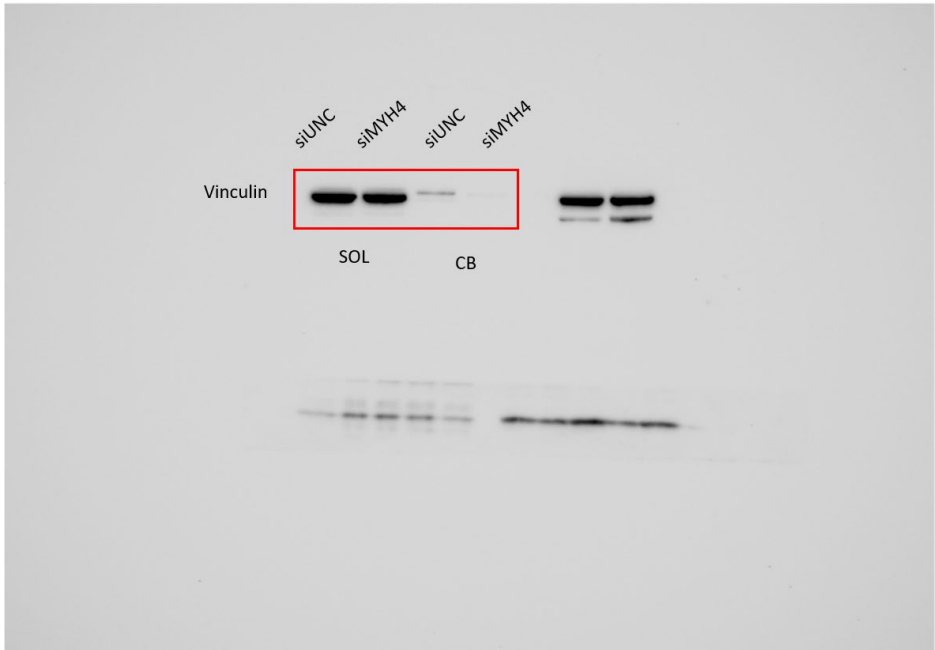

23



**Fig.S3E**

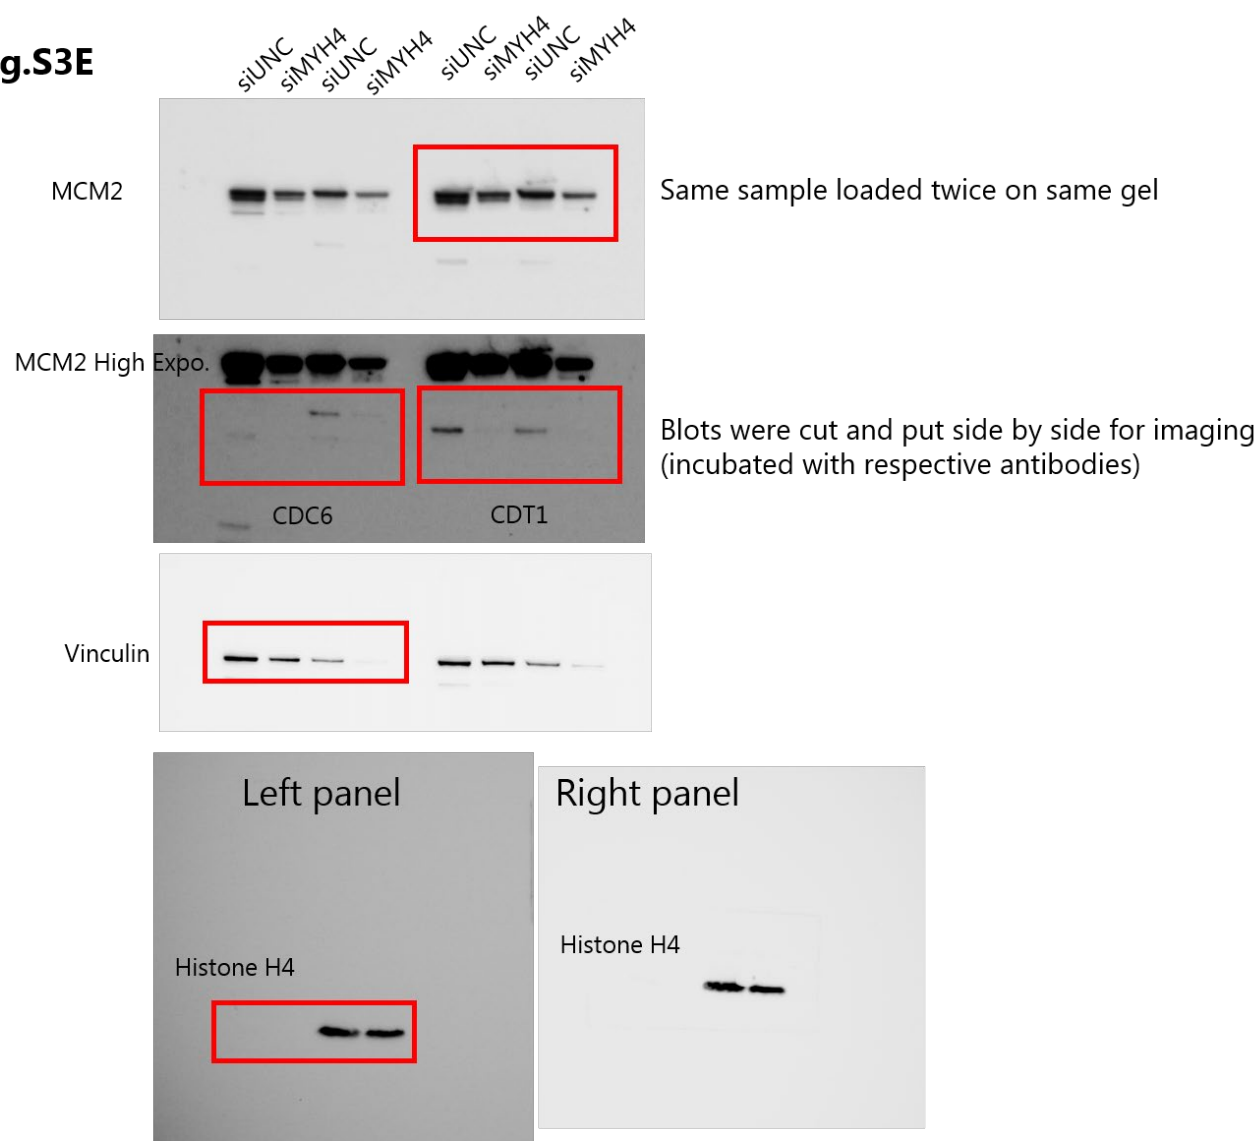

Supplement: sd4 [file 4]
